# Supplementary material for: Child-Staff Ratios in Early Childhood Education and Care Settings and Child Outcomes: A Systematic Review and Meta-Analysis
Source: PLOS journal article supplement (doi:10.1371/journal.pone.0170256), 2017-01-19
Supplement: S4 (10.1371/journal.pone.0170256.s004) [file journal.pone.0170256.s004]

**Child-Staff Ratios in Early Childhood Education and Care Settings and Child Outcomes:  
A Systematic Review and Meta-Analysis**

1

**Supplemental Information 4**

| Child-Staff Ratio Quality Indicator: List of Child Outcome Variables |                    |                                                                 |                   |                   |
|----------------------------------------------------------------------|--------------------|-----------------------------------------------------------------|-------------------|-------------------|
| Outcome Category                                                     | Number of Measures | Child Outcome Variable                                          | Number of Studies | Number of Samples |
| <b>Approach</b>                                                      | n=5                | Child Behavior Inventory - Creativity (CBI)                     | 1                 | 1                 |
|                                                                      |                    | Child Behavior Inventory - Dependence (CBI)                     | 2                 | 2                 |
|                                                                      |                    | Child Behavior Inventory - Dependence (Parent) (CBI)            |                   |                   |
|                                                                      |                    | Child Behavior Inventory - Dependence (Teacher) (CBI)           |                   |                   |
|                                                                      |                    | Child Behavior Inventory - Distractibility (CBI)                | 1                 | 1                 |
|                                                                      |                    | Child Behavior Inventory - Independent (CBI)                    | 1                 | 1                 |
|                                                                      |                    | Child Behavior Inventory - Task Orientation (CBI)               | 2                 | 2                 |
|                                                                      |                    | Child Behavior Inventory - Task Orientation (Parent) (CBI)      |                   |                   |
|                                                                      |                    | Child Behavior Inventory - Task Orientation (Teacher) (CBI)     |                   |                   |
| <b>Cognitive</b>                                                     | n=7                | Bayley Scales of Infant Development-R: Mental Development Index | 1                 | 1                 |
|                                                                      |                    | Bracken Basic Concept Scale - School Readiness (BBCS)           | 2                 | 2                 |
|                                                                      |                    | Child Behavior Inventory - Intelligence (CBI)                   | 3                 | 3                 |
|                                                                      |                    | Child Behavior Inventory - Intelligence (Parent) (CBI)          |                   |                   |
|                                                                      |                    | Child Behavior Inventory - Intelligence (Teacher) (CBI)         |                   |                   |
|                                                                      |                    | Identifying Colors (Color Naming)                               | 1                 | 1                 |
|                                                                      |                    | Intellectual Ability                                            | 1                 | 1                 |
|                                                                      |                    | Preschool Inventory (PSI)                                       | 3                 | 3                 |
|                                                                      |                    | FACES - Social Awareness in the classroom                       | 1                 | 1                 |
| <b>Combo</b>                                                         | n=1                | Child Behavior Rating Scale (CBRS)                              | 1                 | 1                 |
| <b>Language</b>                                                      | n=19               | Academic Rating Scale: Language & Literacy                      | 3                 | 4                 |
|                                                                      |                    | Adaptive Language Inventory (ALI)                               | 1                 | 1                 |
|                                                                      |                    | Communication task                                              | 1                 | 1                 |
|                                                                      |                    | Early Childhood Longitudinal Study - Literacy (ECLS)            | 1                 | 1                 |
|                                                                      |                    | Identifying Letters (Letter-Naming Test, Naming Letters)        | 5                 | 6                 |
|                                                                      |                    | Oral & Written Language Scales - Oral Expression Scale (OWLS)   | 5                 | 5                 |
|                                                                      |                    | Oral & Written Language Scales - Total Scale (OWLS)             | 1                 | 1                 |
|                                                                      |                    | Peabody Picture Vocabulary Test (PPVT-III)                      | 16                | 16                |

**Child-Staff Ratios in Early Childhood Education and Care Settings and Child Outcomes:  
A Systematic Review and Meta-Analysis**

2

| Child-Staff Ratio Quality Indicator: List of Child Outcome Variables |                    |                                                                                                 |                   |                   |
|----------------------------------------------------------------------|--------------------|-------------------------------------------------------------------------------------------------|-------------------|-------------------|
| Outcome Category                                                     | Number of Measures | Child Outcome Variable                                                                          | Number of Studies | Number of Samples |
|                                                                      |                    | Peabody Picture Vocabulary Test (PPVT-R)                                                        |                   |                   |
|                                                                      |                    | Peabody Picture Vocabulary Test (TVIP)                                                          |                   |                   |
|                                                                      |                    | Preschool Language Assessment Instrument (PLAI)                                                 | 1                 | 1                 |
|                                                                      |                    | Reynell Developmental Language Scales (RDLS) - Expressive Language                              | 1                 | 1                 |
|                                                                      |                    | Reynell Developmental Language Scales (RDLS) - Language Comprehension                           | 1                 | 1                 |
|                                                                      |                    | Sequenced Inventory of Communication Development-Revised (SICD-R) -Expressive Communication Age | 1                 | 1                 |
|                                                                      |                    | Sequenced Inventory of Communication Development-Revised (SICD-R)-Receptive Communication Age   | 1                 | 1                 |
|                                                                      |                    | Story & Print Concepts - Book Knowledge                                                         | 1                 | 1                 |
|                                                                      |                    | Woodcock Johnson - Dictation (WJ-R)                                                             | 1                 | 1                 |
|                                                                      |                    | Woodcock Johnson - Letter Word Identification (WJ-III)                                          | 4                 | 4                 |
|                                                                      |                    | Woodcock Johnson - Letter Word Identification (WJ-R)                                            |                   |                   |
|                                                                      |                    | Woodcock Muñoz - Indentificación de Letras y Palabras                                           |                   |                   |
|                                                                      |                    | Woodcock Johnson - Passage Comprehension (WJ-III)                                               | 1                 | 1                 |
|                                                                      |                    | Woodcock Johnson – Revised Reading                                                              | 1                 | 1                 |
|                                                                      |                    | Woodcock Johnson - Rhyming (WJ-III R)                                                           | 3                 | 3                 |
| <b>Math</b>                                                          | n=5                | Counting Task (One-One Counting)                                                                | 1                 | 1                 |
|                                                                      |                    | Early Childhood Longitudinal Study - Math (ECLS)                                                | 1                 | 1                 |
|                                                                      |                    | K-ABC (German Version) Arithmetic (K-ABC)                                                       | 1                 | 1                 |
|                                                                      |                    | Identifying Numbers (Naming Numbers)                                                            | 1                 | 1                 |
|                                                                      |                    | Woodcock Johnson - Applied Problems (WJ-III)                                                    | 9                 | 10                |
|                                                                      |                    | Woodcock Johnson - Applied Problems (WJ-)                                                       |                   |                   |
|                                                                      |                    | Woodcock Muñoz – Problemas                                                                      |                   |                   |
| <b>Physical</b>                                                      | n=1                | Design Copying                                                                                  | 1                 | 1                 |
| <b>Positive Behavior</b>                                             | n=22               | Adaptive Social Behavior Inventory – Comply                                                     | 1                 | 1                 |
|                                                                      |                    | Adaptive Social Behavior Inventory - Comply (Parent) (ASBI)                                     |                   |                   |
|                                                                      |                    | Adaptive Social Behavior Inventory - Comply (Teacher) (ASBI)                                    |                   |                   |
|                                                                      |                    | Adaptive Social Behavior Inventory – Express                                                    | 1                 | 1                 |
|                                                                      |                    | Adaptive Social Behavior Inventory - Express                                                    |                   |                   |

**Outcomes:  
A Systematic Review and Meta-Analysis**

| Child-Staff Ratio Quality Indicator: List of Child Outcome Variables |                    |                                                                                  |                   |                   |
|----------------------------------------------------------------------|--------------------|----------------------------------------------------------------------------------|-------------------|-------------------|
| Outcome Category                                                     | Number of Measures | Child Outcome Variable                                                           | Number of Studies | Number of Samples |
|                                                                      |                    | (Parent) (ASBI)                                                                  |                   |                   |
|                                                                      |                    | Adaptive Social Behavior Inventory - Express (Teacher) (ASBI)                    |                   |                   |
|                                                                      |                    | Child Behavior Inventory - Considerateness (CBI)                                 | 2                 | 2                 |
|                                                                      |                    | Child Behavior Inventory - Considerateness (Parent) (CBI)                        |                   |                   |
|                                                                      |                    | Child Behavior Inventory - Considerateness (Teacher) (CBI)                       |                   |                   |
|                                                                      |                    | Child Behavior Inventory - Sociability (CBI)                                     | 2                 | 2                 |
|                                                                      |                    | Child Behavior Inventory - Sociability (Parent) (CBI)                            |                   |                   |
|                                                                      |                    | Child Behavior Inventory - Sociability (Teacher) (CBI)                           |                   |                   |
|                                                                      |                    | Cooperative Behavior                                                             | 1                 | 1                 |
|                                                                      |                    | Early Childhood Longitudinal Study - Attention & Concentration                   | 1                 | 1                 |
|                                                                      |                    | Early Childhood Longitudinal Study - Attention & Concentration (Teacher)         |                   |                   |
|                                                                      |                    | Early Childhood Longitudinal Study - Attention & Concentration (Parent)          |                   |                   |
|                                                                      |                    | Early Childhood Longitudinal Study - Emotional & Behavioral Regulation           | 1                 | 1                 |
|                                                                      |                    | Early Childhood Longitudinal Study - Emotional & Behavioral Regulation (Teacher) |                   |                   |
|                                                                      |                    | Early Childhood Longitudinal Study - Emotional & Behavioral Regulation (Parent)  |                   |                   |
|                                                                      |                    | Early Childhood Longitudinal Study - Prosocial                                   | 1                 | 1                 |
|                                                                      |                    | Early Childhood Longitudinal Study – Prosocial (Teacher)                         |                   |                   |
|                                                                      |                    | Early Childhood Longitudinal Study – Prosocial (Parent)                          |                   |                   |
|                                                                      |                    | Observational Record of the Caregiving Environment – Self-Reliance (ORCE)        | 1                 | 1                 |
|                                                                      |                    | Observational Record of the Caregiving Environment - Sustained Attention (ORCE)  | 1                 | 1                 |
|                                                                      |                    | Positive Social Behavior Composite                                               | 1                 | 1                 |
|                                                                      |                    | Social - Cognitive Ability                                                       | 1                 | 1                 |
|                                                                      |                    | Social - Competence with Stranger                                                | 1                 | 1                 |
|                                                                      |                    | Social - Competence with Visitor                                                 | 1                 | 1                 |
|                                                                      |                    | Social Competence (rated by teacher)                                             | 1                 | 1                 |
|                                                                      |                    | Social Problem-Solving Skills Procedure - Prosocial Categories                   | 1                 | 1                 |

**Child-Staff Ratios in Early Childhood Education and Care Settings and Child Outcomes:  
A Systematic Review and Meta-Analysis**

4

| Child-Staff Ratio Quality Indicator: List of Child Outcome Variables |                    |                                                                      |                   |                   |
|----------------------------------------------------------------------|--------------------|----------------------------------------------------------------------|-------------------|-------------------|
| Outcome Category                                                     | Number of Measures | Child Outcome Variable                                               | Number of Studies | Number of Samples |
|                                                                      |                    | Social Problem-Solving Skills Procedure - Prosocial Responses        | 2                 | 2                 |
|                                                                      |                    | Social Skills Rating Scale                                           | 1                 | 1                 |
|                                                                      |                    | Social Skills Rating Scale - Parent                                  |                   |                   |
|                                                                      |                    | Social Skills Rating Scale - Teacher                                 |                   |                   |
|                                                                      |                    | Social Skills and Behavior Problems Scale - Social Competence (SSBS) | 1                 | 1                 |
|                                                                      |                    | Student-Teacher Relationship Scale - shortened (STRS)                | 1                 | 1                 |
|                                                                      |                    | Teacher Child Rating Scale - Social Competence (TCRS)                | 4                 | 5                 |
|                                                                      |                    | The California Preschool Social Competency Scale Social Competence   | 1                 | 1                 |
| Problem Behavior                                                     | n=23               | Behavior Problems Composite                                          | 1                 | 1                 |
|                                                                      |                    | Behavior Problems Index - Antisocial (BPI)                           | 1                 | 1                 |
|                                                                      |                    | Behavior Problems Index - Attention-Deficit (BPI)                    | 1                 | 1                 |
|                                                                      |                    | Behavior Problems Index - Depressed (BPI)                            | 1                 | 1                 |
|                                                                      |                    | Behavior Problems Index - Immature/Dependent (BPI)                   | 1                 | 1                 |
|                                                                      |                    | Child Behavior Checklist - Externalizing (Parent) (CBCL)             | 1                 | 1                 |
|                                                                      |                    | Child Behavior Checklist - Internalizing (Parent) (CBCL)             | 1                 | 1                 |
|                                                                      |                    | Child Behavior Inventory - Apathy (CBI)                              | 1                 | 1                 |
|                                                                      |                    | Child Behavior Inventory - Behavior Problems (CBI)                   | 1                 | 1                 |
|                                                                      |                    | Child Behavior Inventory - Hostility (CBI)                           | 1                 | 1                 |
|                                                                      |                    | FACES - Aggressive Behavior                                          | 1                 | 1                 |
|                                                                      |                    | FACES - Aggressive Behavior (Parent)                                 |                   |                   |
|                                                                      |                    | FACES - Aggressive Behavior (Teacher)                                |                   |                   |
|                                                                      |                    | FACES - Hyperactive Behavior                                         | 1                 | 1                 |
|                                                                      |                    | FACES - Hyperactive Behavior- Parent                                 |                   |                   |
|                                                                      |                    | FACES - Hyperactive Behavior- Teacher                                |                   |                   |
|                                                                      |                    | FACES - Withdrawn Behaviors                                          | 1                 | 1                 |
|                                                                      |                    | FACES - Withdrawn Behaviors - Parent                                 |                   |                   |
|                                                                      |                    | FACES - Withdrawn Behaviors - Teacher                                |                   |                   |
|                                                                      |                    | Preschool Behavior Questionnaire - Aggression (PBQ) (Parent)         | 1                 | 1                 |
|                                                                      |                    | Preschool Behavior Questionnaire - Aggression (PBQ) (Teacher)        |                   |                   |

**Child-Staff Ratios in Early Childhood Education and Care Settings and Child Outcomes:  
A Systematic Review and Meta-Analysis**

5

| Child-Staff Ratio Quality Indicator: List of Child Outcome Variables |                    |                                                                      |                   |                   |
|----------------------------------------------------------------------|--------------------|----------------------------------------------------------------------|-------------------|-------------------|
| Outcome Category                                                     | Number of Measures | Child Outcome Variable                                               | Number of Studies | Number of Samples |
|                                                                      |                    | Preschool Behavior Questionnaire - Anxiety (PBQ)                     | 1                 | 1                 |
|                                                                      |                    | Preschool Behavior Questionnaire - Anxiety (PBQ) (Parent)            |                   |                   |
|                                                                      |                    | Preschool Behavior Questionnaire - Anxiety (PBQ) (Teacher)           |                   |                   |
|                                                                      |                    | Preschool Behavior Questionnaire - Hyperactivity (PBQ)               | 2                 | 2                 |
|                                                                      |                    | Preschool Behavior Questionnaire – Hyperactivity/Distractible (PBQ)  |                   |                   |
|                                                                      |                    | Preschool Behavior Questionnaire - Hyperactivity (PBQ) (Parent)      |                   |                   |
|                                                                      |                    | Preschool Behavior Questionnaire - Hyperactivity (PBQ) Teacher)      |                   |                   |
|                                                                      |                    | Preschool Behavior Scale - Hyperactivity (PBS)                       | 1                 | 1                 |
|                                                                      |                    | Social Problem-Solving Skills Procedure - Antisocial Categories      | 1                 | 1                 |
|                                                                      |                    | Social Problem-Solving Skills Procedure - Antisocial Responses       | 1                 | 1                 |
|                                                                      |                    | Social Skills and Behavior Problems Scale - Behavior Problems (SSBS) | 1                 | 1                 |
|                                                                      |                    | Teacher Child Rating Scale - Behavior Problems (TCRS)                | 3                 | 4                 |
|                                                                      |                    | Teacher's Report Form - Externalizing (Teacher) (TCRF)               | 2                 | 2                 |
|                                                                      |                    | Teacher's Report Form - Internalizing (Teacher) (TCRF)               | 2                 | 2                 |
| <b>Total</b>                                                         | <b>n=83</b>        |                                                                      |                   |                   |
